# Supplementary material for: Sacrificial species approach to designing robust transition metal phosphide cathodes for alkaline water electrolysis in discontinuous operation
Source: Royal Society of Chemistry journal article supplement (doi:10.1039/d1ta01181b), 2021-01-01
Supplement: d1ta01181b1.pdf [file d1ta01181b1.pdf]

# **Sacrificial Species Approach to Designing Robust Transition Metal Phosphide Cathodes for Alkaline Water Electrolysis in Discontinuous Operation**

Ik-Sun Kim,<sup>ab</sup> Hyun-Seok Cho<sup>\*a</sup>, MinJoong Kim,<sup>\*a</sup> Hyun-Jung Oh,<sup>c</sup> Sang-Yeon Lee,<sup>c</sup> Yong-Kul Lee,<sup>c</sup> Changsoo Lee,<sup>a</sup> Jae Hun Lee,<sup>a</sup> Won Chul Cho,<sup>a</sup> Sang-Kyung Kim,<sup>a</sup> Jong Hoon Joo,<sup>bd</sup> and Chang-Hee Kim<sup>\*a</sup>

a. Hydrogen Research Department, Korea Institute of Energy Research, Daejeon, 34129, Republic of Korea

b. Department of Urban, Energy, and Environmental Engineering, Chungbuk National University, Cheongju, 28644, Republic of Korea

c. Department of Chemical Engineering, Dankook University, Yongin, 16890, Republic of Korea

d. Department of Advanced Material Engineering, Chungbuk National University, Cheongju, 28644, Republic of Korea

## Supporting Information

## Experimental

### 1. Sample Preparation

Before electrodeposition, the Ni substrate (ATI 201™, 99.6 % purity, ATI Metals Corp., US) was electrochemically degreased in 25 wt.% NaOH at 85 °C for 2 min, rinsed with deionized water, treated with 20 % HCl at room temperature for 2 min to remove the surface oxides, and rinsed with deionized water again. Coatings of cobalt phosphide (CoP<sub>x</sub>) and manganese-cobalt phosphide (Mn<sub>n</sub>Co<sub>1-n</sub>P<sub>x</sub>) were deposited on Ni substrate and then embedded in a polyether ether ketone holder, leaving an open area of 1.77 cm<sup>2</sup>. The two-electrode system was configured with Ni plate as the counter electrode, the distance between the working and counter electrodes was 2 cm, and the temperature was 25 °C. The compositions of electrodeposition baths are listed in **Table S11**. The depositions of both CoP<sub>x</sub> and Mn<sub>n</sub>Co<sub>1-n</sub>P<sub>x</sub> were performed at a constant current density of -112 mA cm<sup>-2</sup> for 450 s. During deposition, hydrogen bubbles were vigorously produced at the electrode surface.

### 2. Electrochemical Analysis

The typical three-electrode measurement was performed in 1 M KOH solution at 25 °C, using CoP<sub>x</sub>/ Mn<sub>n</sub>Co<sub>1-n</sub>P<sub>x</sub> as the working electrode with an open area of 0.785 cm<sup>2</sup>, Pt plate (i.e., 50 mm x 50 mm) and a graphite rod (i.e., outer diameter 6 mm, length 145 mm) with a glass frit as the counter electrode, and Hg/HgO as the reference. The electrochemical control and data acquisition employed SP-240 (Biologic) with EC-lab software. The EIS measurement was made in the frequency range from 100 kHz to 10 mHz at -1.1 V (vs. Hg/HgO) with a sinusoidal

amplitude of 10 mV. LSV was used to evaluate the HER activity in the range from -0.9 to -1.6 V (vs. Hg/HgO) with a scan rate of 1 mV s<sup>-1</sup>. The electrical circuit was left open during the shut-down condition, no current or voltage was applied, and the potential changes were recorded against the reference electrode. The LSV experiment was also carried out after the shut-down condition to compare the HER activity with the pristine curve. The LSV curves were IR-compensated based on the high frequency resistance acquired from EIS measurement. Since HER activity of non-precious metals in aqueous solution were reported the possible overestimation due to the re-deposition of Pt clusters from the counter electrode onto the non-precious metal working electrode, the aqueous HER data with Pt counter electrode may produce inaccuracies for HER activity measurement. In this study, the HER activities of CoP<sub>x</sub>/Mn<sub>n</sub>Co<sub>1-n</sub>P<sub>x</sub> with a carbon rod counter electrode were compared and showed no deviation regardless of counter electrodes, as shown in **Fig. S16**. The potential for HER activity of the CoP<sub>x</sub> and Mn<sub>n</sub>Co<sub>1-n</sub>P<sub>x</sub> was converted to RHE scales. To convert E<sub>Hg/HgO</sub> to E<sub>RHE</sub>, following equation was used: E<sub>RHE</sub> = E<sub>Hg/HgO</sub> + 0.097 + 0.059pH.

### 3. Structure and Surface Characterizations

The surface morphologies and chemical composition were analyzed by Scanning Electron Microscope (SEM, HITACHI, S-4800) coupled with Energy Dispersive X-ray Spectroscopy (EDS, HORIBA, X-Max50). Before SEM analysis, all samples were coated with Os. In addition, Transmission Electron Microscopy (TEM, FEI, Talos F200X) and TEM-EDS (Bruker, Super X EDS system) analysis were carried out to investigate details of surface crystalline of Mn<sub>n</sub>Co<sub>1-n</sub>P<sub>x</sub>. To prepare cross-sectional TEM sample, ion cutting using Focused Ion Beam (FIB, FEI, Helios G4) was implemented. The samples were coated with carbon

followed by Pt before FIB cutting. XRD patterns for bulk and thin surface layer were recorded with the X-Ray diffractometer (Rigaku, SmartLab) and the low-angle XRD X-ray diffractometer (low-angle XRD, Rigaku, D/MAX-2500), respectively. The stainless steel 316 was used as a substrate for low-angle XRD ( $\text{CoP}_x/\text{SUS}$  and  $\text{Mn}_n\text{Co}_{1-n}\text{P}_x/\text{SUS}$ ) because the identifications were disturbed by strong Ni peaks on the Ni substrates (**Fig. S17**). The oxidation state and electronic state of Co, Mn, and O were investigated by an XPS spectrometer (Thermo VG Scientific, K-Alpha).

#### 4. X-ray Absorption Measurements

XAS spectra at the Co K-edge (7.708 keV) were collected at Beamline 8C of the Pohang Light Source (PLS), which has a flux of  $2 \times 10^{12}$  photons  $\text{s}^{-1}$  at 300 mA and 3.0 GeV. The samples were electroplated on Ni foam for measurement in the transmission mode. For the *in situ* XAS, a home-made electrochemical cell with a 5 mm gap was used for transmission measurement. The cell used  $\text{N}_2$ -purged 1.0 M KOH as the electrolyte solution, with a Pt wire counter electrode and a Hg/HgO reference electrode. The XAFS data were analyzed using Winxas 3.1 software.

**Table S1.** A comparison with reported HER activity on CoP<sub>x</sub> in alkaline electrolyte.

| Catalyst                                   | Overpotential@<br>10 mA cm <sup>-2</sup> | ref              |
|--------------------------------------------|------------------------------------------|------------------|
| <b>CoP<sub>x</sub>/Ni</b>                  | <b>65 mV</b>                             | <b>This work</b> |
| Ni substrate                               | 201 mV                                   | This work        |
| Mn-Co-P/Ti                                 | 76 mV                                    | 1                |
| Zn <sub>0.08</sub> Co <sub>0.92</sub> P/TM | 67 mV                                    | 2                |
| CoP/CC                                     | 209 mV                                   | 3                |
| Co <sub>2</sub> P/RGO                      | 88 mV                                    | 4                |
| CoP-MNA                                    | 54 mV                                    | 5                |
| np-CoP NWs/Ti                              | 100 mV                                   | 6                |
| CoP NS/C                                   | 111 mV                                   | 7                |
| CoP nanoarrays/CC                          | 95 mV                                    | 8                |
| CoP <sub>3</sub> NAs/CFP                   | 119 mV                                   | 9                |

**Table S2.** Possible redox couples of Co in alkaline electrolyte.<sup>10</sup>

| Redox couple                                        | Reaction                                                                                                | Potential<br>[V <sub>Hg/HgO</sub> ] |
|-----------------------------------------------------|---------------------------------------------------------------------------------------------------------|-------------------------------------|
| Co/Co(OH) <sub>2</sub>                              | $\text{Co} + 2\text{OH}^- \rightarrow \text{Co(OH)}_2 + 2\text{e}^-$                                    | -0.818                              |
| Co/CoO                                              | $\text{Co} + 2\text{OH}^- \rightarrow \text{CoO} + \text{H}_2\text{O} + 2\text{e}^-$                    | -0.792                              |
| Co/Co <sub>3</sub> O <sub>4</sub>                   | $3\text{Co} + 8\text{OH}^- \rightarrow \text{Co}_3\text{O}_4 + 4\text{H}_2\text{O} + 8\text{e}^-$       | -0.661                              |
| Co/CoOOH                                            | $2\text{Co} + 3\text{OH}^- \rightarrow \text{CoOOH} + \text{H}_2\text{O} + 3\text{e}^-$                 | -0.563                              |
| CoO/Co <sub>3</sub> O <sub>4</sub>                  | $3\text{CoO} + 2\text{OH}^- \rightarrow \text{Co}_3\text{O}_4 + \text{H}_2\text{O} + 2\text{e}^-$       | -0.369                              |
| Co/CoO <sub>2</sub>                                 | $\text{Co} + 4\text{OH}^- \rightarrow \text{CoO}_2 + 2\text{H}_2\text{O} + 4\text{e}^-$                 | -0.282                              |
| Co(OH) <sub>2</sub> /Co <sub>3</sub> O <sub>4</sub> | $3\text{Co(OH)}_2 + 2\text{OH}^- \rightarrow \text{Co}_3\text{O}_4 + 4\text{H}_2\text{O} + 2\text{e}^-$ | -0.192                              |
| CoO/CoOOH                                           | $\text{CoO} + \text{OH}^- \rightarrow \text{CoOOH} + \text{H}_2\text{O} + \text{e}^-$                   | -0.172                              |
| Co(OH) <sub>2</sub> /CoOOH                          | $\text{Co(OH)}_2 + \text{OH}^- \rightarrow \text{CoOOH} + \text{H}_2\text{O} + \text{e}^-$              | -0.054                              |

**Table S3.** Kinetic parameters used for the construction of Evans diagram.

| Possible reaction                                                           | Potential<br>[V vs. Hg/HgO] | Kinetic parameter     |          |                        |
|-----------------------------------------------------------------------------|-----------------------------|-----------------------|----------|------------------------|
|                                                                             |                             | $i_0$                 | $\alpha$ | b                      |
| $\text{Co} + 2\text{OH}^- \rightarrow \text{Co}(\text{OH})_2 + 2\text{e}^-$ | -0.827                      | $5.0 \times 10^{-5}$  | 1.8      | $3.28 \times 10^{-2}$  |
| $\text{O}_2 + 2\text{H}_2\text{O} + 4\text{e}^- \rightarrow 4\text{OH}^-$   | 0.304                       | $2.5 \times 10^{-42}$ | 2.0      | $-2.95 \times 10^{-2}$ |

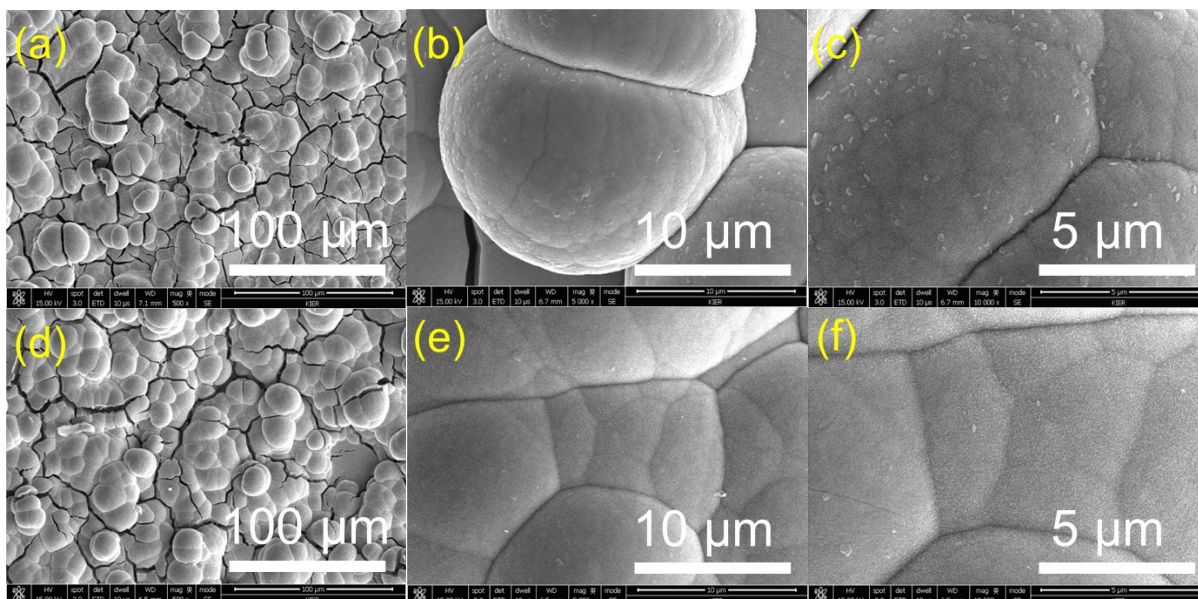

**Fig. S1.** (a),(b),(c) 500x, 5,000x, 10,000x of SEM images of the CoP<sub>x</sub>. (d),(e),(f) 500x, 5,000x, 10,000x of SEM images of the CoP<sub>x</sub> after shut-down for 5 h in 1M KOH.

**Table S4.** EDS result of CoP<sub>x</sub>.

| Element | Weight % | Atomic % |
|---------|----------|----------|
| P       | 3.49     | 6.44     |
| Co      | 96.51    | 93.56    |
| Totals  | 100.00   | 100.00   |

**Table S5.** EDS result of CoP<sub>x</sub> after hold off condition for 5 h in 1M KOH.

| Element | Weight % | Atomic % |
|---------|----------|----------|
| P       | 2.95     | 5.46     |
| Co      | 97.05    | 94.54    |
| Totals  | 100.00   | 100.00   |



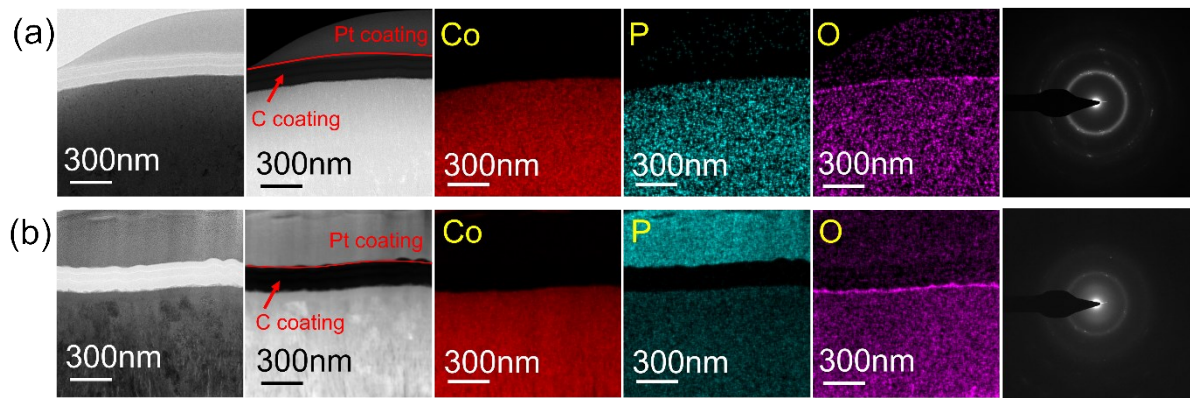

**Fig. S2.** (From left) TEM, STEM, TEM-EDS images and SAED pattern for  $\text{CoP}_x$ . (a) before hold-off condition (b) after hold-off for 5 h.

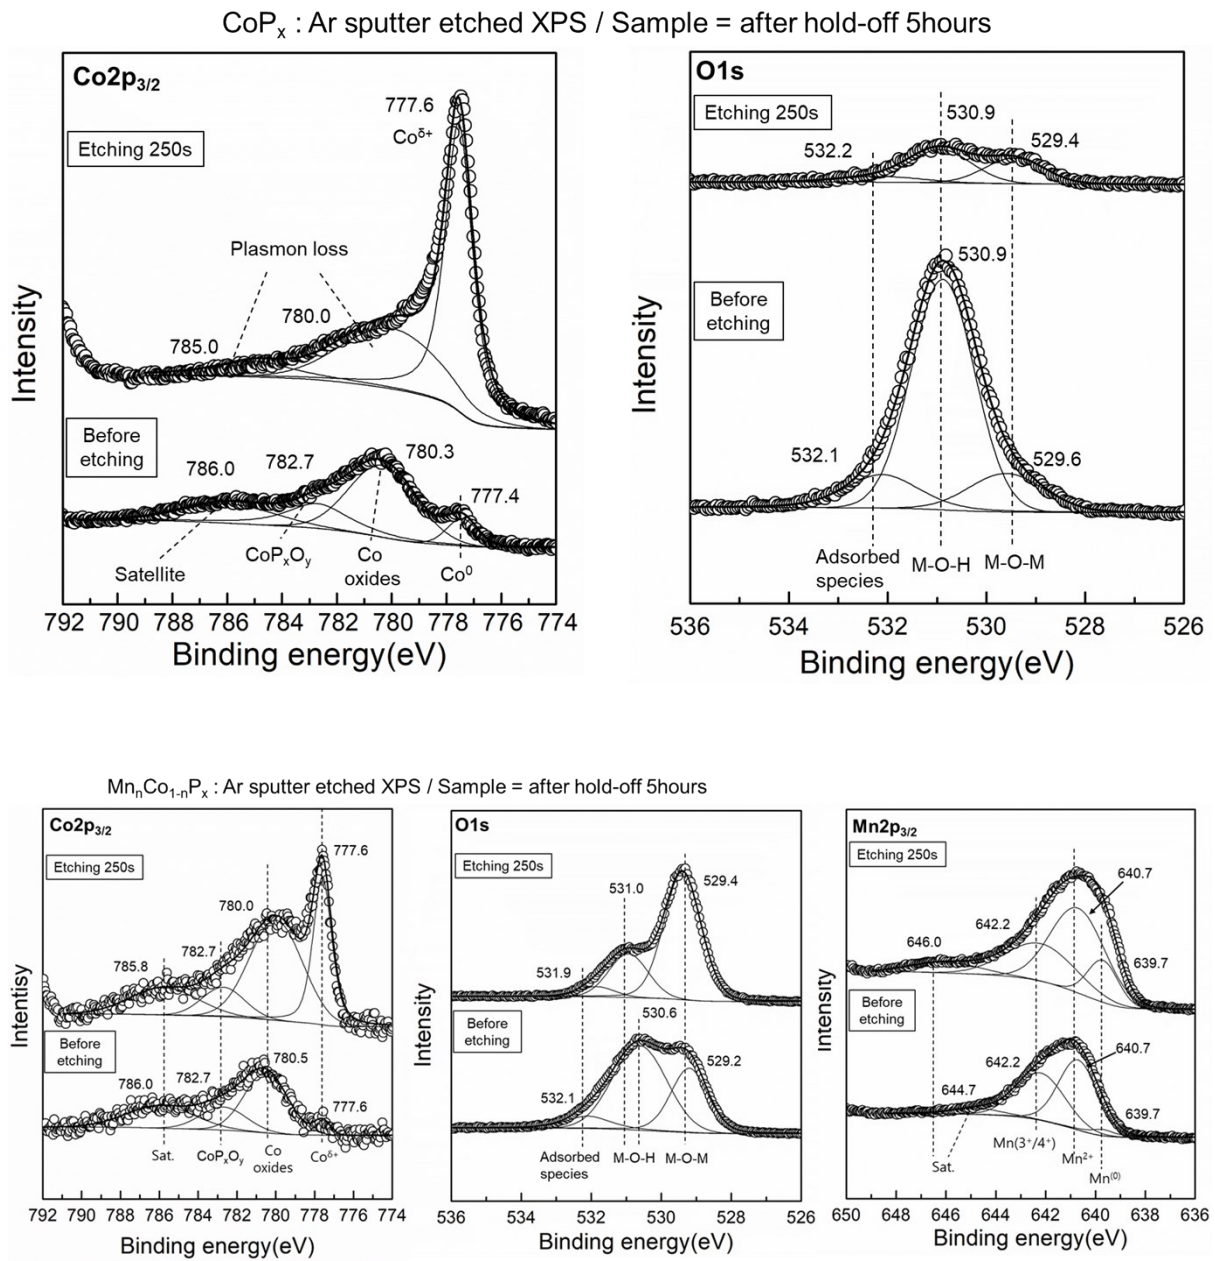

**Fig. S3.** The XPS depth profiles with Ar<sup>+</sup> ion sputter on electrodeposited CoP<sub>x</sub> and Mn<sub>n</sub>Co<sub>1-n</sub>P<sub>x</sub>

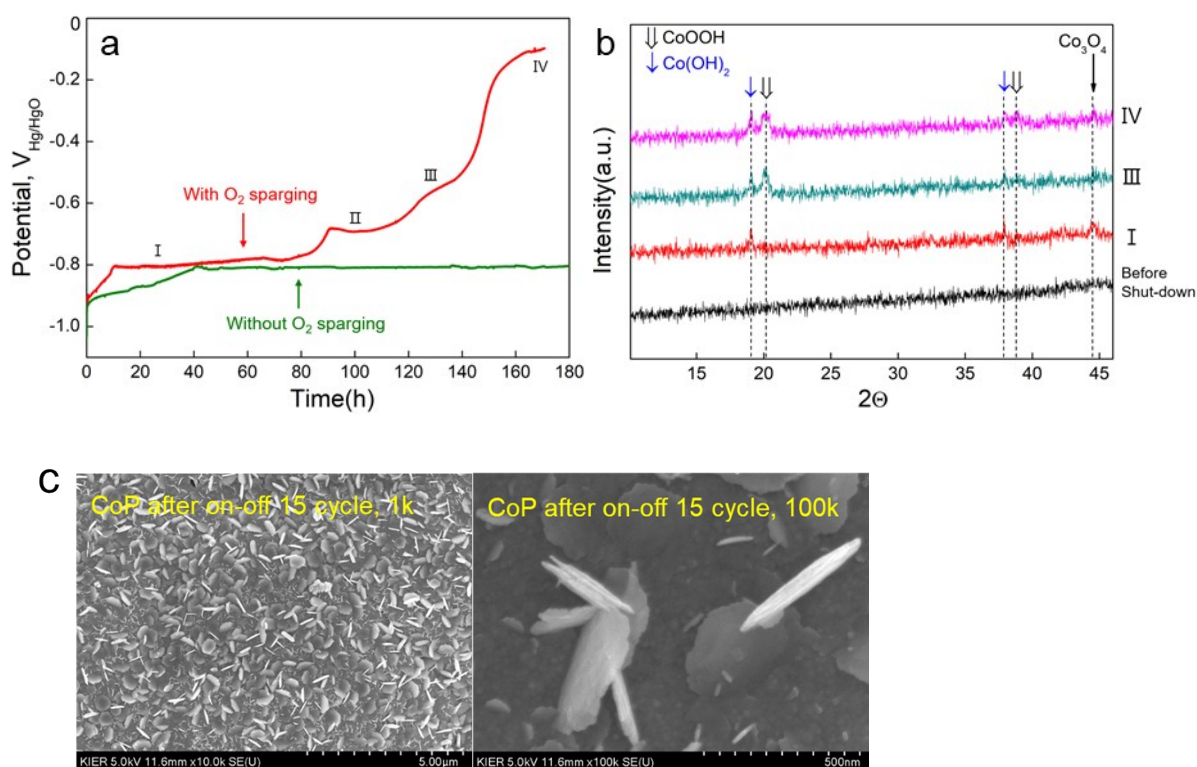

Below reactions are listed in **Table S2**.

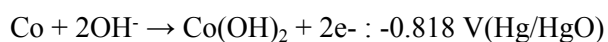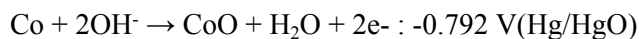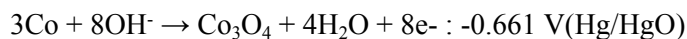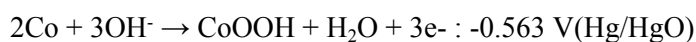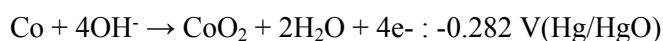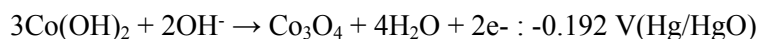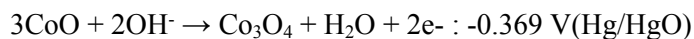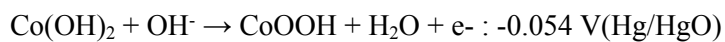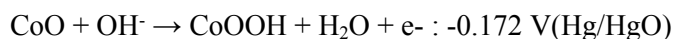

**Fig. S4.** (a) OCV change with sparging  $\text{O}_2$  (b) XRD peaks of the samples with the different OCV range.<sup>11-14</sup> (c) surface of  $\text{CoP}_x$  after 15 on/off cycles

| Sacrificial species | Oxidation reaction                                                          | Potential [V <sub>Hg/HgO</sub> ] |
|---------------------|-----------------------------------------------------------------------------|----------------------------------|
| Al                  | $\text{Al} + 3\text{OH}^- \rightarrow \text{Al}(\text{OH})_3 + 3\text{e}^-$ | -2.407                           |
| Cr                  | $\text{Cr} + 3\text{OH}^- \rightarrow \text{Al}(\text{OH})_3 + 3\text{e}^-$ | -1.577                           |
| Mn                  | $\text{Mn} + 2\text{OH}^- \rightarrow \text{Mn}(\text{OH})_2 + 2\text{e}^-$ | -1.657                           |
| Zn                  | $\text{Zn} + 2\text{OH}^- \rightarrow \text{Zn}(\text{OH})_2 + 2\text{e}^-$ | -1.346                           |

**Table S6.**  
Possible sacrificial anode and oxidation reaction.

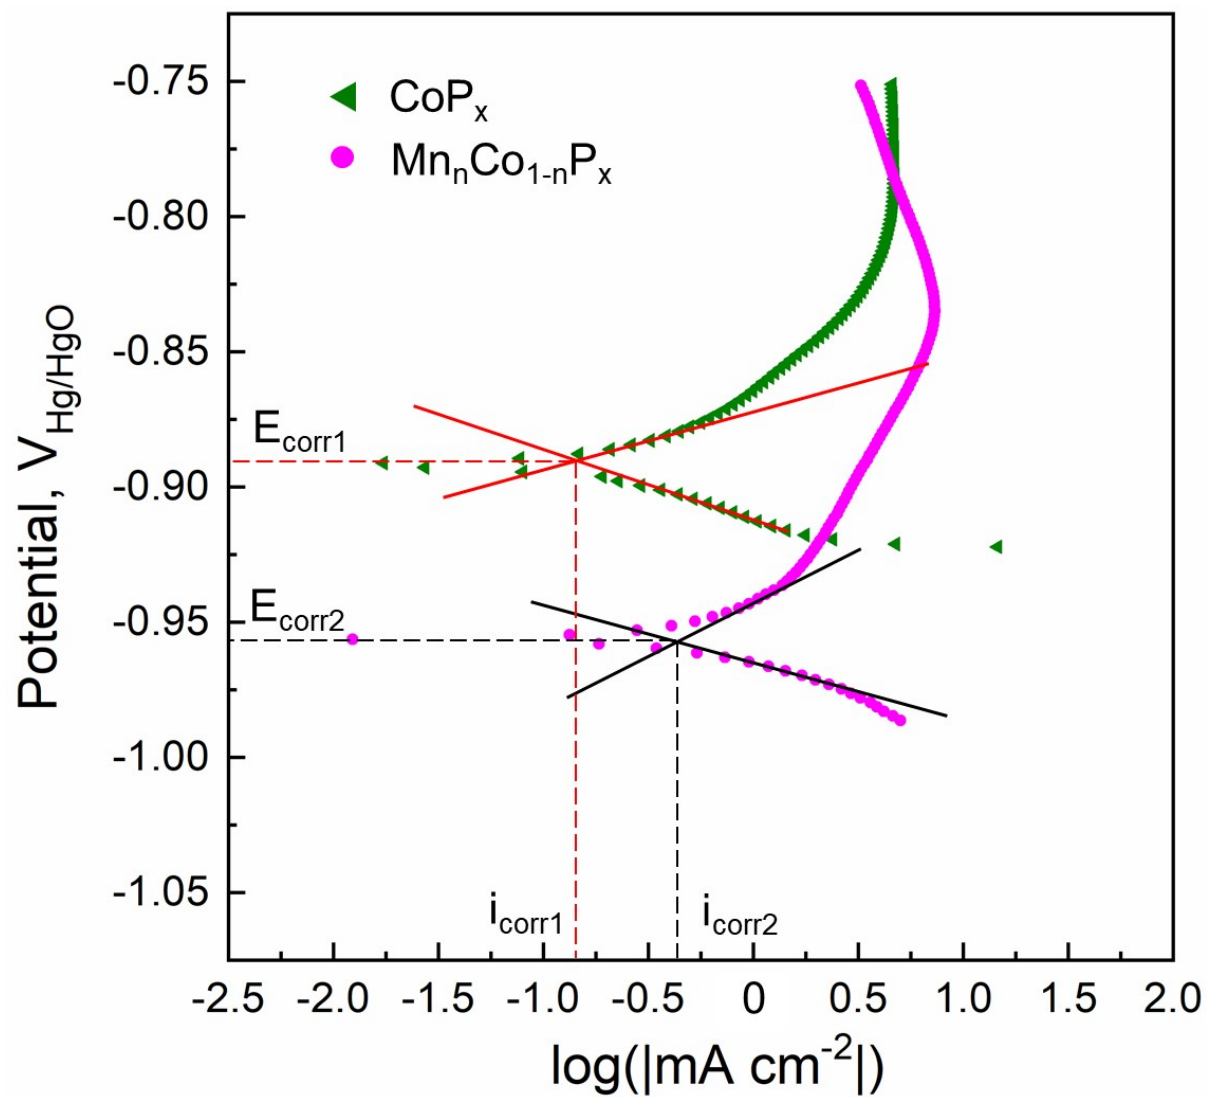

**Fig. S5.** Experimental cathodic and anodic polarization curve for  $\text{CoP}_x$  and  $\text{Mn}_n\text{Co}_{1-n}\text{P}_x$  in 1 M KOH without  $\text{O}_2$  sparging



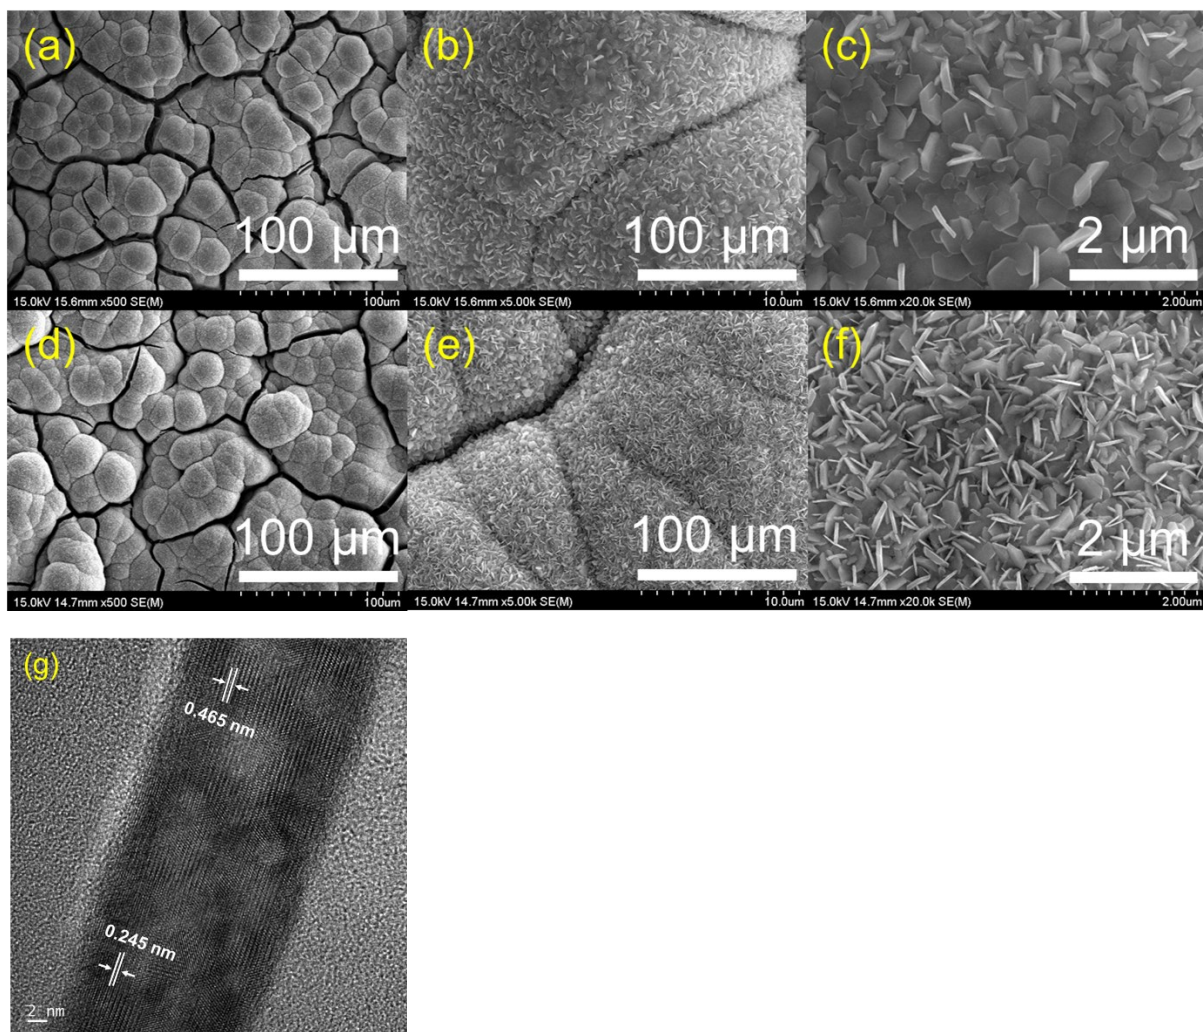

**Fig. S6.** (a),(b),(c) 500x, 5,000x, 10,000x of SEM images of the  $Mn_nCo_{1-n}P_x$ . (d),(e),(f) 500x, 5,000x, 10,000x of SEM images, (g) HRTEM images of the flake of the  $Mn_nCo_{1-n}P_x$  before OCV condition in 1M KOH.

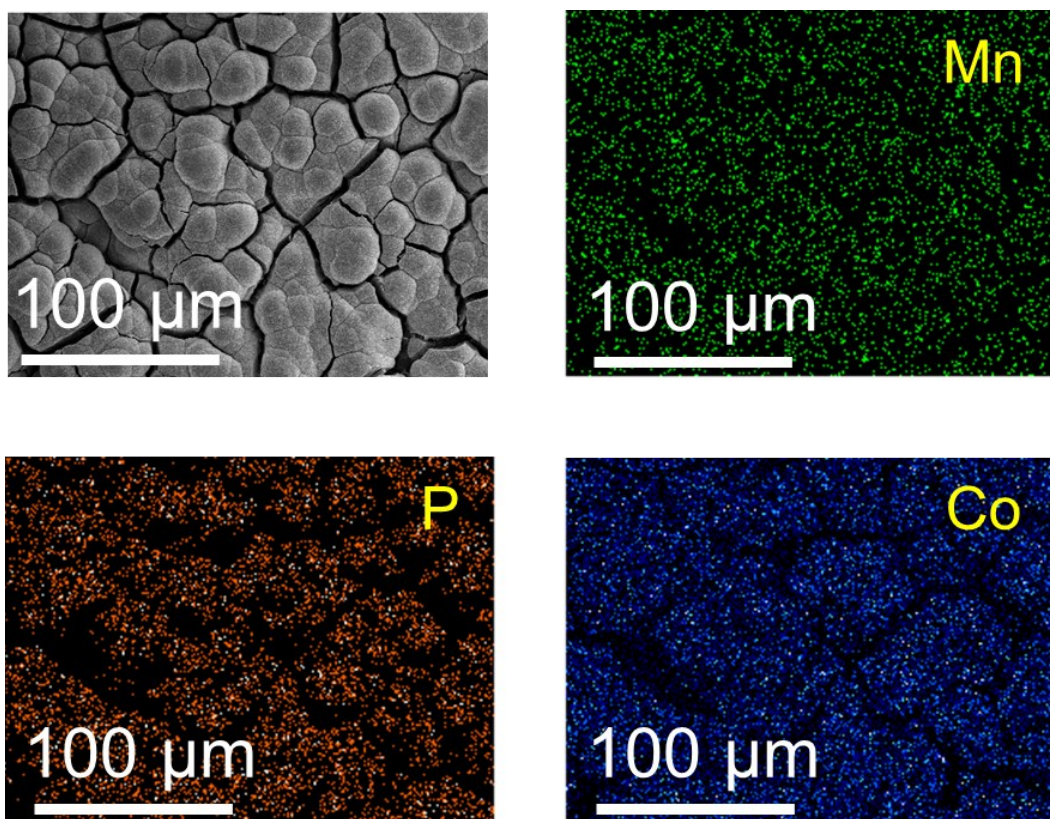

**Fig. S7.** EDS mapping of the  $\text{Mn}_n\text{Co}_{1-n}\text{P}_x$  after HER.

**Table S7.** EDS result of  $\text{Mn}_n\text{Co}_{1-n}\text{P}_x$  after HER.

| Element | Weight % | Atomic % |
|---------|----------|----------|
| P K     | 4.91     | 8.91     |
| Mn K    | 4.94     | 5.05     |
| Co K    | 90.16    | 86.04    |
| Totals  | 100.00   | 100.00   |

**Table S8.** EDS result of  $\text{Mn}_n\text{Co}_{1-n}\text{P}_x$  after OCV condition for 5 h in 1M KOH.

| Element | Weight % | Atomic % |
|---------|----------|----------|
| P K     | 4.77     | 8.65     |
| Mn K    | 8.52     | 8.71     |
| Co K    | 86.71    | 82.64    |
| Totals  | 100.00   | 100.00   |



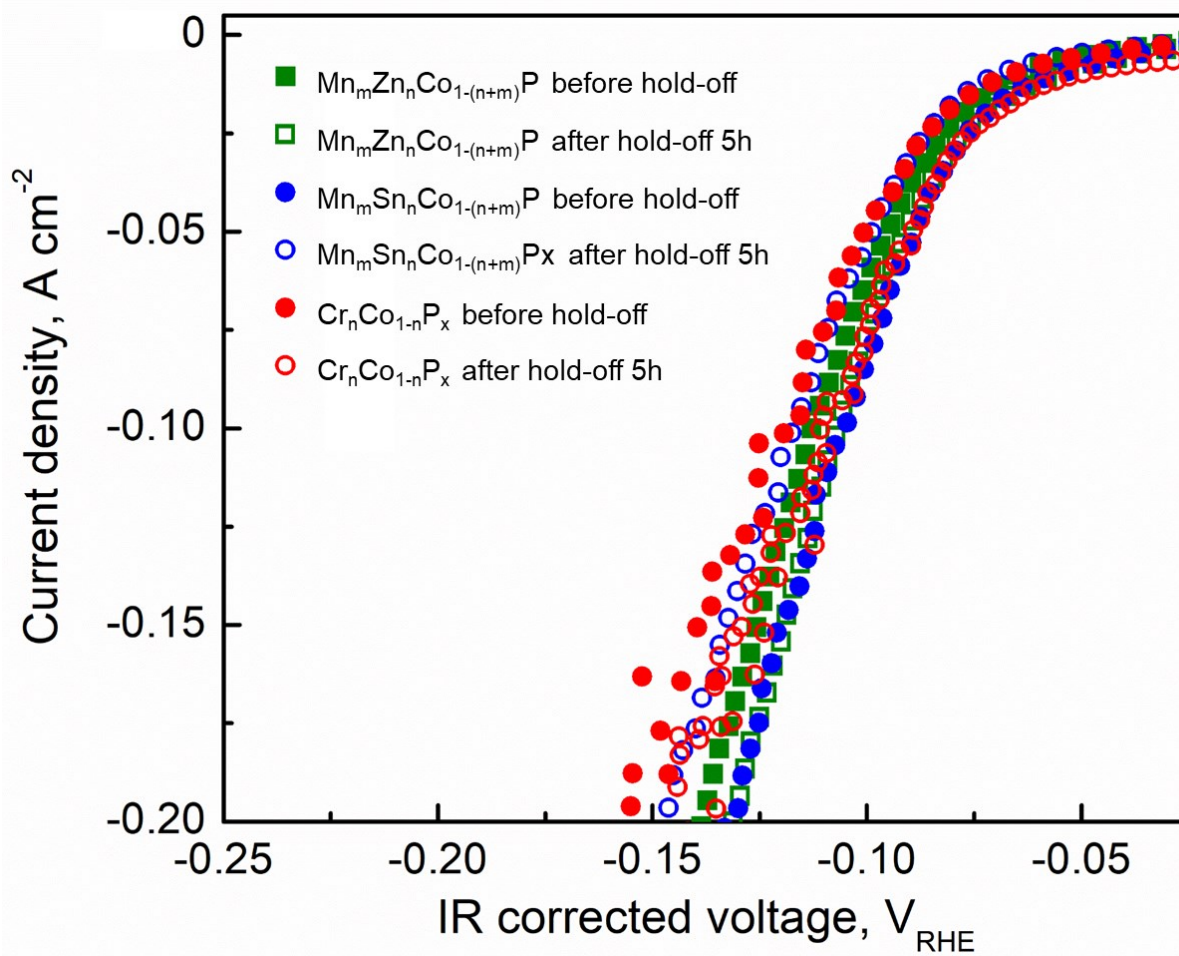

**Fig. S8.** The HER activity before and after hold-off for 5 hours of the CoPx-based various transition metal doped HER electrode.

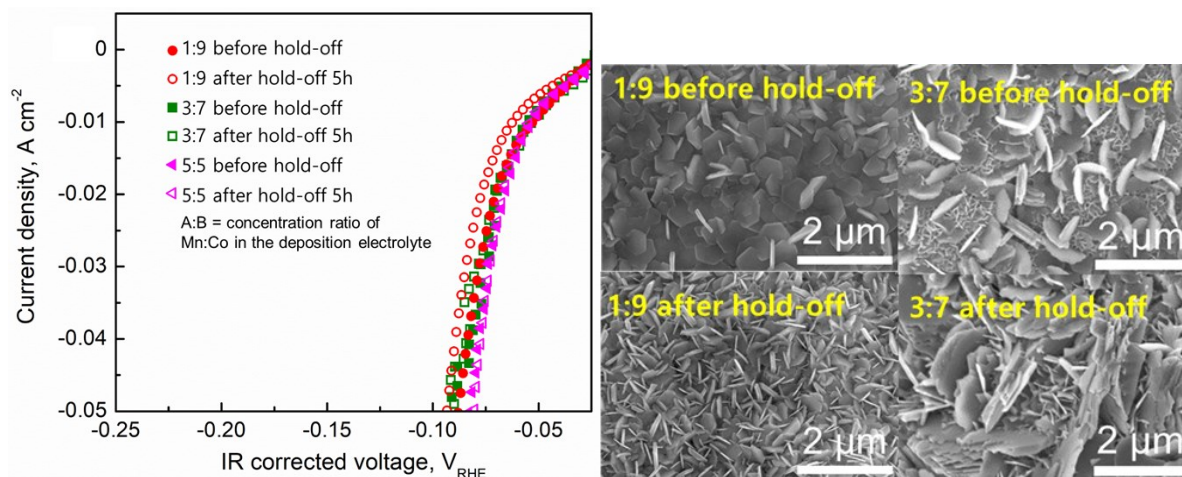

**Fig. S9.** The influence of Mn content on the structure, activity, and stability of the resulting  $\text{Mn}_n\text{Co}_{1-n}\text{P}_x$  in both continuous and discontinuous operation

**Table. S9** The chemical ratio of Mn and P for  $\text{Mn}_n\text{Co}_{1-n}\text{P}_x$  as increasing of Mn contents

| elements | before hold-off |          |           |          | after hold-off |          |           |         |
|----------|-----------------|----------|-----------|----------|----------------|----------|-----------|---------|
|          | Mn:Co=1:9       |          | Mn:Co=3:7 |          | Mn:Co=1:9      |          | Mn:Co=3:7 |         |
|          | weight %        | Atomic % | weight %  | Atomic % | Weight %       | Atomic % | weight %  | Atomic% |
| P        | 4.91            | 8.91     | 8.34      | 14.67    | 4.77           | 8.65     | 3.00      | 5.50    |
| Mn       | 4.94            | 5.05     | 7.70      | 7.65     | 8.52           | 8.71     | 18.68     | 19.25   |
| Co       | 90.16           | 86.04    | 83.96     | 77.68    | 86.71          | 82.64    | 78.32     | 75.25   |

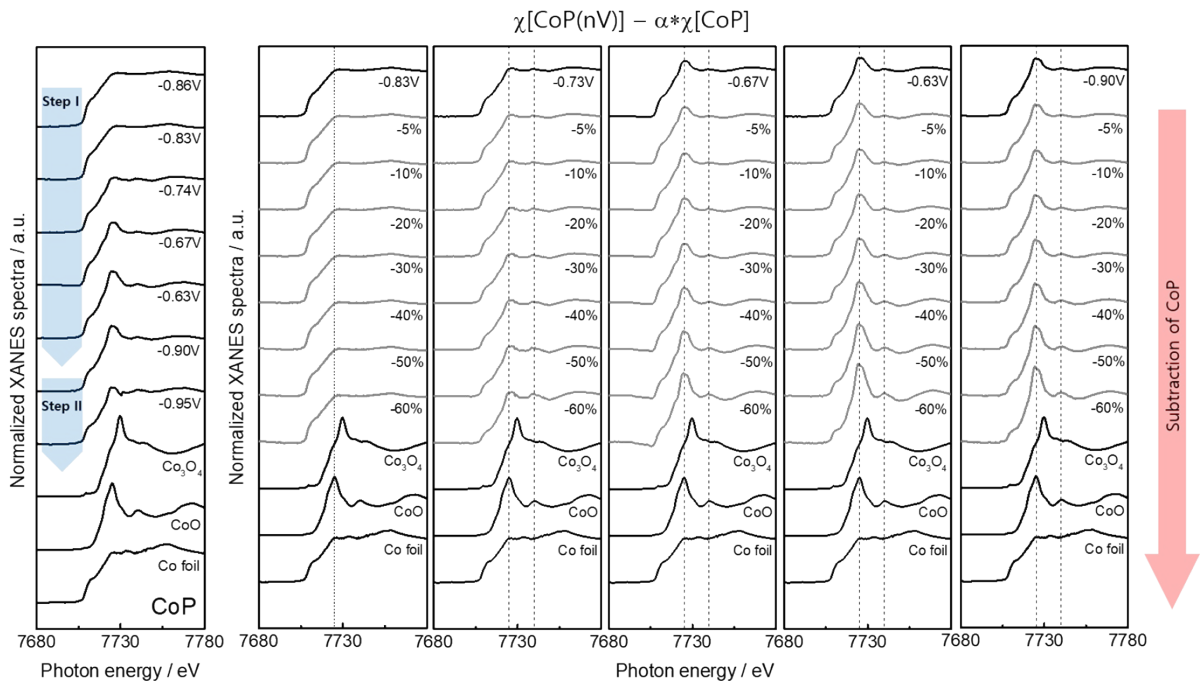

**Fig. S10.** Subtraction of the XANES spectrum of  $\text{CoP}_x$  from those obtained in CV cycles

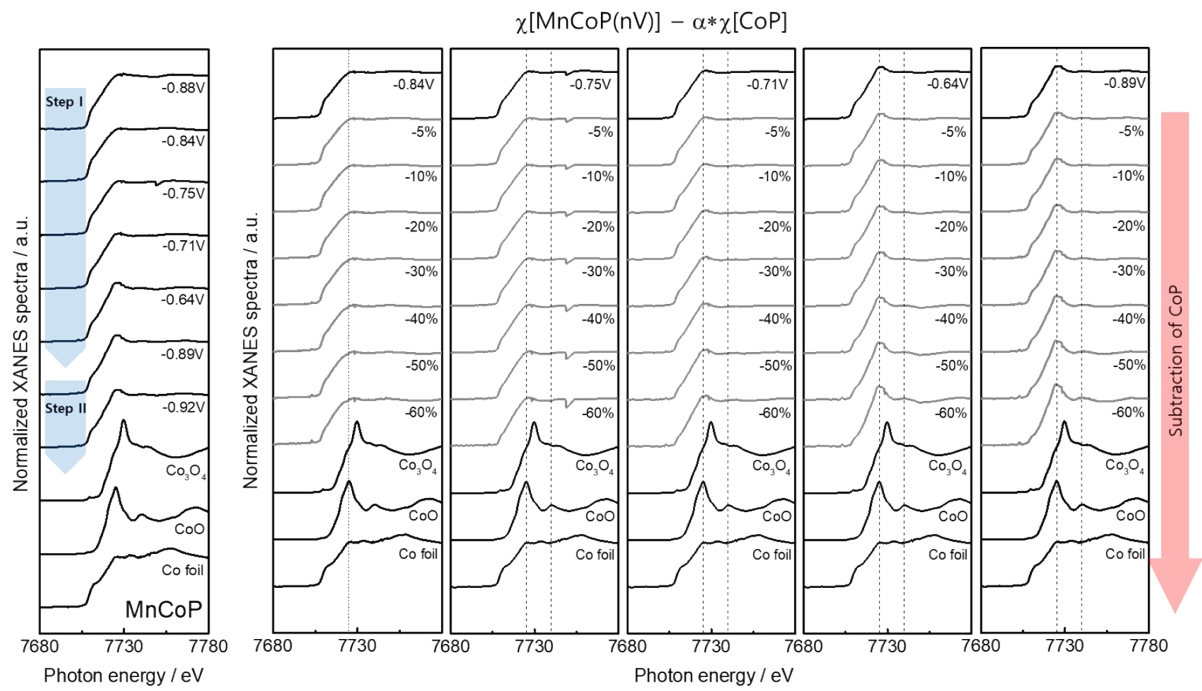

**Fig. S11.** Subtraction of the XANES spectrum of  $\text{CoP}_x$  from  $\text{Mn}_n\text{Co}_{1-n}\text{P}_x$  those obtained in CV cycles

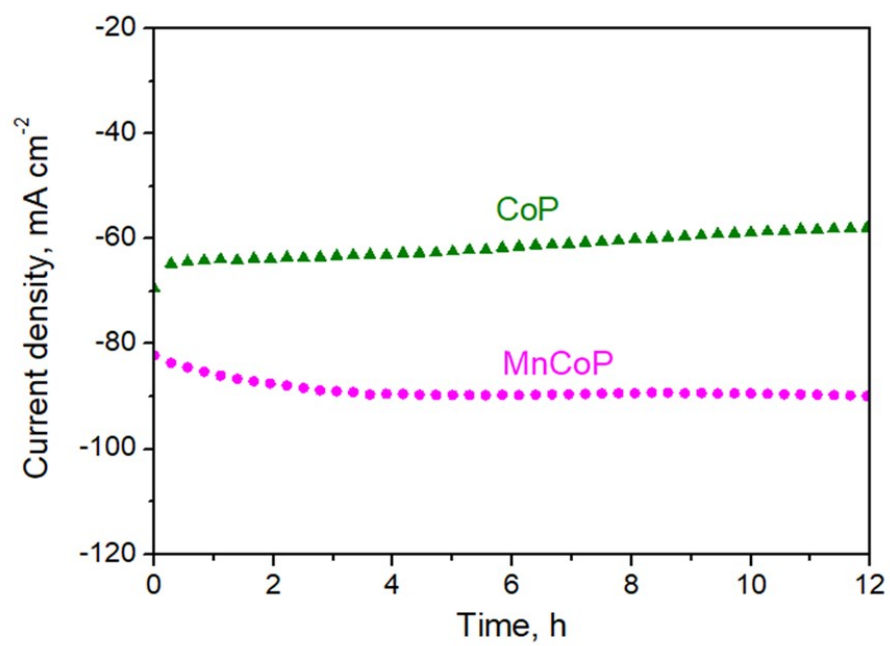

**Fig. S12.** The durability test of  $\text{CoP}_x$  and  $\text{Mn}_n\text{Co}_{1-n}\text{P}_x$  electrodes in continuous operation (constant potential of -1.1 V (vs. Hg/HgO) in 1 M KOH at 25°C

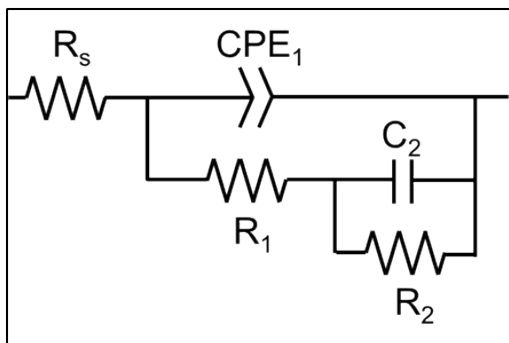

**Fig. S13.** 2TP equivalent circuit model for EIS fitting.

**Table S10.** Impedance parameters for equivalent circuit of the 2TP model obtained by fitting EIS experimental.

| Parameter<br>[units]        | CoP <sub>x</sub> |                    |                    | Mn <sub>n</sub> Co <sub>1-n</sub> P <sub>x</sub> |                    |                    |
|-----------------------------|------------------|--------------------|--------------------|--------------------------------------------------|--------------------|--------------------|
|                             | Before on-off    | After<br>15 cycles | After<br>50 cycles | Before on-off                                    | After<br>15 cycles | After<br>50 cycles |
| RS [Ohm]                    | 1.24             | 0.961              | 1.27               | 1.171                                            | 0.907              | 1.165              |
| R1 [Ohm]                    | 0.26             | 0.844              | 1.622              | 0.156                                            | 0.3                | 0.818              |
| R2 [Ohm]                    | 0.12             | 0.423              | 4.827              | 0.197                                            | 0.263              | 0.555              |
| Q1 [F·s <sup>-(a-1)</sup> ] | 0.168            | 0.052              | 0.0016             | 0.367                                            | 0.082              | 96                 |
| a                           | 0.890            | 0.963              | 1                  | 0.76                                             | 1                  | 0.967              |
| CCPE [F]                    | 0.1114           | 0.045              | 0.0016             | 0.143                                            | 0.082              | 0.0864             |
| C <sub>2</sub> [F]          | 1.348            | 0.017              | 0.004              | 0.933                                            | 0.04               | 0.016              |

(i)  $Q_1$  and  $a_1$  are the constant and exponent, respectively,  $R_s$  is the solution resistance.  $R_1$  represents the HER charge transfer resistance, and  $R_2$  is the resistance related to hydrogen adsorption.

CoP<sub>x</sub> after on-off 15 cycle

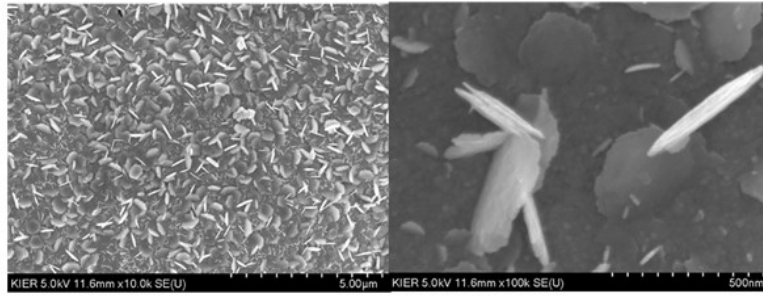

| Element | Weight % | Atomic % |
|---------|----------|----------|
| P K     | 2.03     | 3.79     |
| Co K    | 97.97    | 96.21    |
| Totals  | 100      | 100      |

Mn<sub>n</sub>Co<sub>1-n</sub>P<sub>x</sub> after on-off 15 cycle

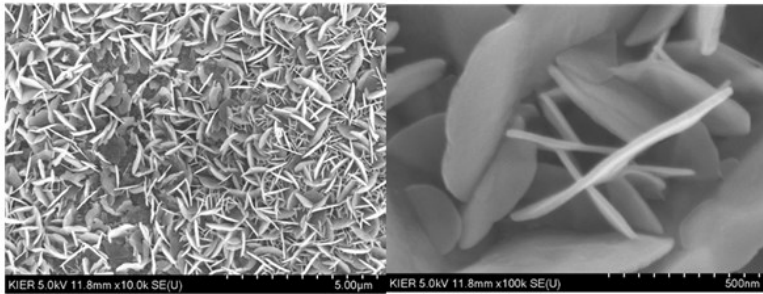

| Element | Weight % | Atomic % |
|---------|----------|----------|
| P K     | 2.62     | 4.83     |
| Mn K    | 9.13     | 9.50     |
| Co K    | 88.25    | 85.67    |
| Totals  | 100      | 100      |

**Fig. S14.** SEM-EDS results for CoP<sub>x</sub> and Mn<sub>n</sub>Co<sub>1-n</sub>P<sub>x</sub> in discontinuous operation

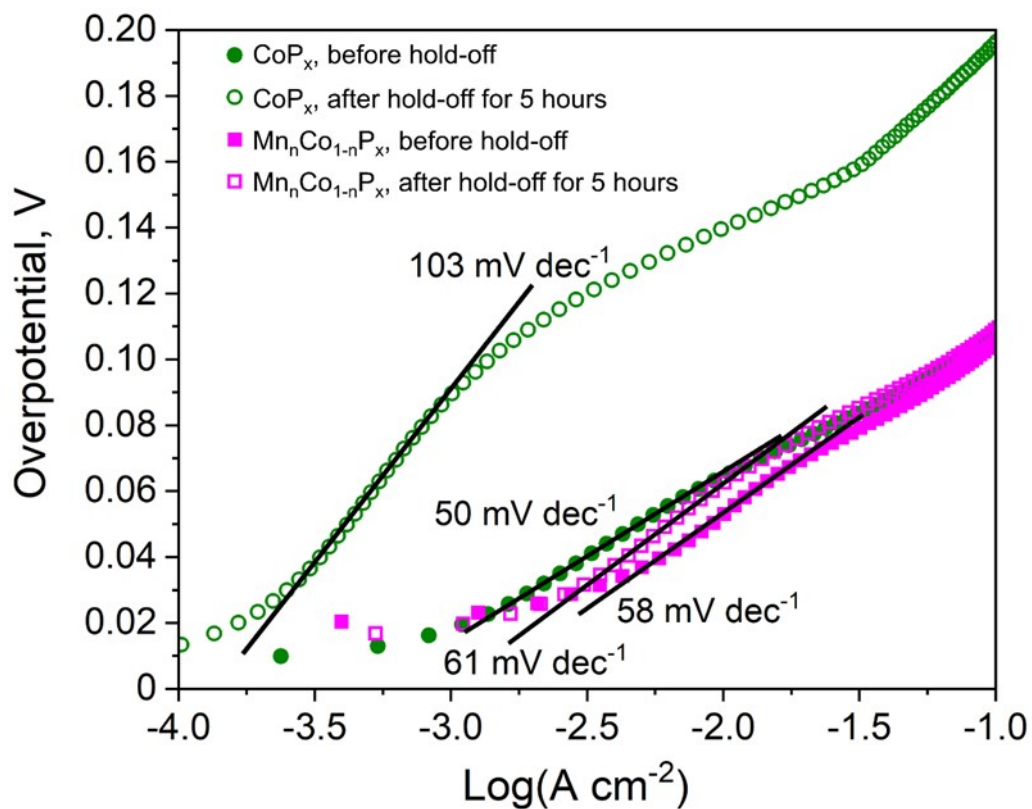

**Fig. S15.** Tafel plots for the CoP<sub>x</sub> and Mn<sub>n</sub>Co<sub>1-n</sub>P<sub>x</sub> before and after hold-off conditions



**Table S11.** The compositions of electrodeposition baths for  $\text{CoP}_x$  and  $\text{Mn}_n\text{Co}_{1-n}\text{P}_x$ .

| Chemicals                                          | Composition (g/L) |                                        |
|----------------------------------------------------|-------------------|----------------------------------------|
|                                                    | $\text{CoP}_x$    | $\text{Mn}_n\text{Co}_{1-n}\text{P}_x$ |
| $\text{CoCl}_2 \cdot 6\text{H}_2\text{O}$          | 142.76            | 128.48                                 |
| $\text{MnCl}_2$                                    | -                 | 11.87                                  |
| $\text{NaH}_2\text{PO}_2 \cdot \text{H}_2\text{O}$ | 127.2             | 127.2                                  |
| Glycine                                            | 45.04             | 45.04                                  |
| Boric acid                                         | 6.18              | 6.18                                   |
| Saccharine                                         | 0.5               | 0.5                                    |

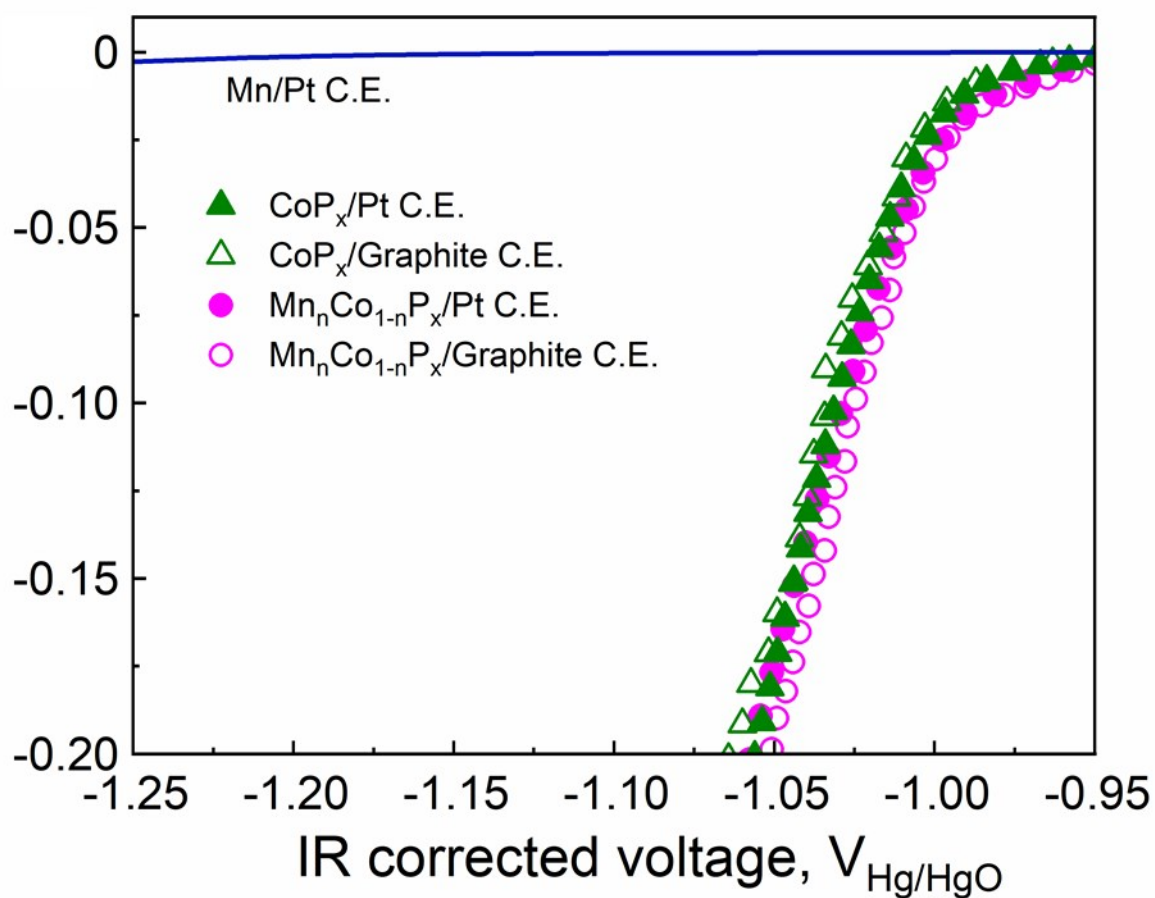

**Fig. S16.** LSV curves for HER on a  $\text{CoP}_x$  and  $\text{Mn}_n\text{Co}_{1-n}\text{P}_x$  using a graphite carbon and a platinum plate as the counter electrode.

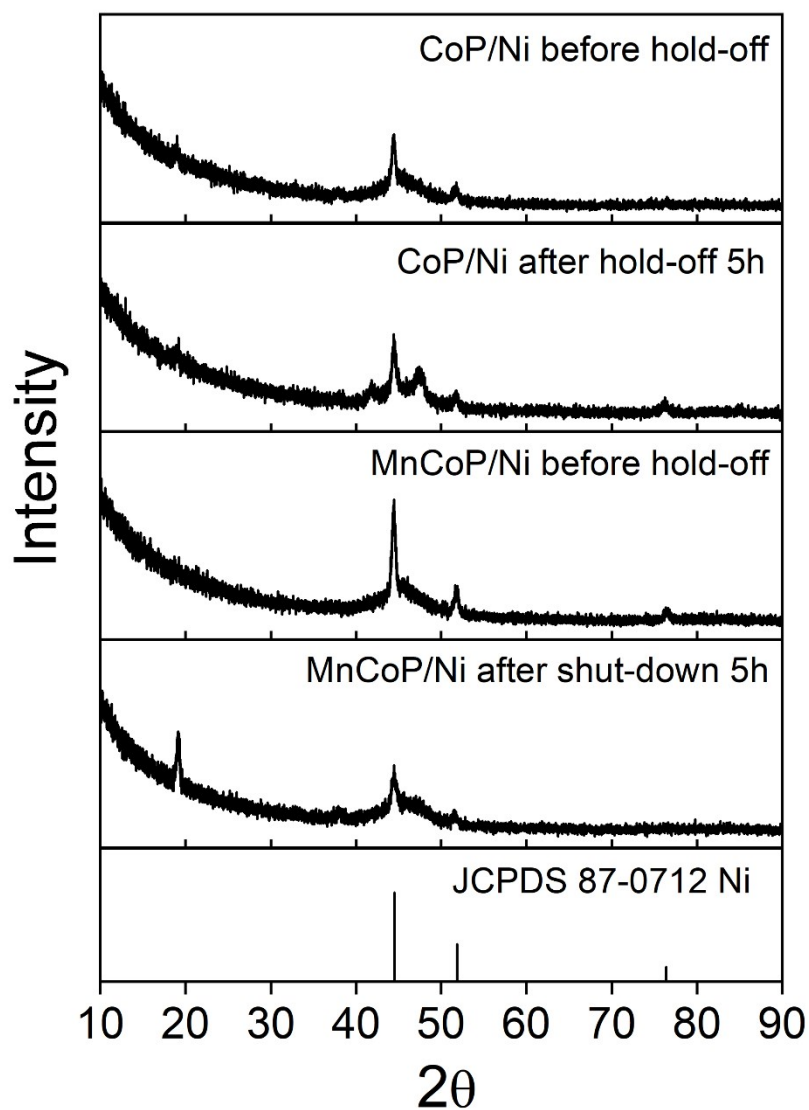

Fig. S17. XRD analysis for  $\text{CoP}_x$  and MnCoP on the Ni substrate.

## References for Supporting Information

- (1) Liu, T.; Ma, X.; Liu, D.; Hao, S.; Du, G.; Ma, Y.; Asiri, A. M.; Sun, X.; Chen, L. Mn doping of CoP nanosheets array: an efficient electrocatalyst for hydrogen evolution reaction with enhanced activity at all pH values. *ACS Energy Lett.* **2017**, *7* (1), 98-102.  
<https://doi.org/10.1021/acscatal.6b02849>
- (2) Liu, T.; Liu, D.; Qu, F.; Wang, D.; Zhang, L.; Ge, R.; Hao, S.; Ma, Y.; Du, G.; Asiri, A. M. Enhanced electrocatalysis for energy-efficient hydrogen production over CoP catalyst with nonelectroactive Zn as a promoter. *Adv. Energy Mater.* **2017**, *7* (15), 1700020.  
<https://doi.org/10.1002/aenm.201700020>
- (3) Tian, J.; Liu, Q.; Asiri, A. M.; Sun, X. Self-supported nanoporous cobalt phosphide nanowire arrays: an efficient 3D hydrogen-evolving cathode over the wide range of pH 0–14. *J. Am. Chem. Soc.* **2014**, *136* (21), 7587-7590. <https://doi.org/10.1021/ja503372r>
- (4) Wang, J.; Yang, W.; Liu, J. CoP 2 nanoparticles on reduced graphene oxide sheets as a super-efficient bifunctional electrocatalyst for full water splitting. *J. Mater. Chem. A* **2016**, *4* (13), 4686-4690. <https://doi.org/10.1039/C6TA00596A>
- (5) Zhu, Y. P.; Liu, Y. P.; Ren, T. Z.; Yuan, Z. Y. Self-supported cobalt phosphide mesoporous nanorod arrays: a flexible and bifunctional electrode for highly active electrocatalytic water reduction and oxidation. *Advanced Functional Materials* **2015**, *25* (47), 7337-7347. <https://doi.org/10.1002/adfm.201503666>
- (6) Gu, S.; Du, H.; Asiri, A. M.; Sun, X.; Li, C. M. Three-dimensional interconnected network of nanoporous CoP nanowires as an efficient hydrogen evolution cathode. *Phys. Chem. Chem. Phys.* **2014**, *16* (32), 16909-16913. <https://doi.org/10.1039/C4CP02613F>
- (7) Chang, J.; Liang, L.; Li, C.; Wang, M.; Ge, J.; Liu, C.; Xing, W. Ultrathin cobalt phosphide nanosheets as efficient bifunctional catalysts for a water electrolysis cell and the

origin for cell performance degradation. *Green Chemistry* **2016**, *18* (8), 2287-2295.

<https://doi.org/10.1039/C5GC02899J>

(8) Wang, P.; Song, F.; Amal, R.; Ng, Y. H.; Hu, X. Efficient water splitting catalyzed by cobalt phosphide-based nanoneedle arrays supported on carbon cloth. *ChemSusChem* **2016**, *9* (5), 472-477. <https://doi.org/10.1002/cssc.201501599>

(9) Wu, T.; Pi, M.; Zhang, D.; Chen, S. 3D structured porous CoP 3 nanoneedle arrays as an efficient bifunctional electrocatalyst for the evolution reaction of hydrogen and oxygen. *J. Mater. Chem. A* **2016**, *4* (38), 14539-14544.

(10) Behl, W. K.; Toni, J. E. Anodic oxidation of cobalt in potassium hydroxide electrolytes. *J. Electroanal. Chem. Interf. Electrochem.* **1971**, *31* (1), 63-75.

[https://doi.org/10.1016/S0022-0728\(71\)80043-8](https://doi.org/10.1016/S0022-0728(71)80043-8)

(11) Gong, L.; Liu, X. Facile synthesis and capacitive characteristics of Co (OH) 2 nanoflakes via a solid-reaction route at room temperature. *Materials Letters* **2011**, *65* (13), 2025-2028. <https://doi.org/10.1016/j.matlet.2011.04.022>

(12) Moon, S.; Vuong, N. M.; Lee, D.; Kim, D.; Lee, H.; Kim, D.; Hong, S.-K.; Yoon, S.-G. Co<sub>3</sub>O<sub>4</sub>-SWCNT composites for H<sub>2</sub>S gas sensor application. *Sensors and Actuators B: Chemical* **2016**, *222*, 166-172. <https://doi.org/10.1016/j.snb.2015.08.072>

(13) Liu, Y.-C.; Koza, J. A.; Switzer, J. A. Conversion of electrodeposited Co (OH) 2 to CoOOH and Co<sub>3</sub>O<sub>4</sub>, and comparison of their catalytic activity for the oxygen evolution reaction. *Electrochim. Acta* **2014**, *140*, 359-365.

<https://doi.org/10.1016/j.electacta.2014.04.036>

(14) Du, J.; Li, C.; Wang, X.; Jones, T. G.; Liang, H.-P. Cobalt oxyhydroxide with highly porous structures as active and stable phase for efficient water oxidation. *Electrochim. Acta* **2019**, *303*, 231-238. <https://doi.org/10.1016/j.electacta.2019.02.083>
